1 CView: A network based tool for enhanced  
2 alignment visualization

3

4

5 Raquel Linheiro<sup>§,1</sup>, Diana Lobo<sup>§,1,2,3</sup>, Stephen Sabatino<sup>§,1,3</sup> and John  
6 Archer<sup>\*,1,3</sup>

7

8 <sup>§</sup>Contributed equally

9

10 <sup>\*</sup>Corresponding

11

12 Email: john.archer@cibio.up.pt

13

14 <sup>1</sup> CIBIO, Centro de Investigação em Biodiversidade e Recursos Genéticos, *InBIO*  
15 Laboratório Associado, Campus de Vairão, Universidade do Porto, Vairão, Portugal.

16

17 <sup>2</sup> Departamento de Biologia, Faculdade de Ciências, Universidade do Porto, Porto,  
18 Portugal

19

20 <sup>3</sup> BIOPOLIS, Program in Genomics, Biodiversity and Land Planning, CIBIO, Campus  
21 de Vairão, Vairão, Portugal.

22

23

24

25

26

27

28

29

30

31

32

33

34

35

36

37

38

39

40

41

42

43

44

45

46

47

48

## 49 **Abstract**

50 To date basic visualization of sequence alignments have largely focused on  
51 displaying per-site columns of nucleotide, or amino acid, residues along with  
52 associated frequency summarizations. The persistence of this tendency to the  
53 more recent tools designed for the viewing of mapped read data indicates that  
54 such a perspective not only provides a reliable visualization of per-site  
55 alterations, but also offers implicit reassurance to the end user in relation to  
56 data accessibility. However, the initial insight gained is limited, something that  
57 is especially true when viewing alignments consisting of many sequences  
58 representing differing factors, such as geographical location, date and  
59 subtype. A basic alignment viewer can have potential to increase initial insight  
60 through visual enhancement, whilst not delving into the realms of complex  
61 sequence analysis. Here we present CView, a visualizer that expands on the  
62 per-site representation of residues through the incorporation of a dynamic  
63 network that is based on the summarization of diversity present across  
64 different regions of the alignment. Within the network nodes are based on the  
65 clustering of sequence fragments spanning windows that are placed  
66 consecutively along the alignment. Edges are placed between nodes of  
67 neighbouring windows where they share sequence id's. Thus, if a single node  
68 is selected on the network, then the relationship that all sequences passing  
69 through that node have to other regions of diversity within the alignment can  
70 be instantly observed through the tracing of paths. In addition to augmenting  
71 visual insight, CView provides many export features including variant  
72 summarization, per-site residue and kmer frequency matrixes, consensus  
73 sequence generation, alignment dissection as well as general sequence

74 clustering, each of which are useful across a range of research areas. The  
75 software has been designed to be user friendly, intuitive and interactive. It,  
76 along with source code, a quick start guide and test data, are available  
77 through the SourceForge project page: <https://sourceforge.net/projects/cview/>.

78

79

80

81

82

83

84

85

86

87

88

89

90

91

92

93

94

95

96

97

98

## 99 **Introduction**

100 Tools developed to visualize local sets of aligned sequences, such as those  
101 produced by multiple sequence aligners including MUSCLE [1] and Clustal W  
102 [2], have focused largely on displaying columns of nucleotide or amino acid  
103 characters, and highlighting the differences between such characters primarily  
104 through the use of colour [3–7]. More advanced sequence management and  
105 analysis packages, such as Geneious [8] and Mega [9], as well as the more  
106 recent tools designed for basic visualization of mapped read data, including  
107 IGV [10], GenomeView [11] and Tablet [12], incorporate a wide array of  
108 analysis, summarization and annotation options, but in terms of basic  
109 visualization they follow a similar approach. It is evident that direct  
110 observation of residues, as well as the general per-site based summarization,  
111 not only provides an accessible view of per-site alterations between  
112 sequences within the alignment but also at times gives the end user a level of  
113 reassurance in relation to their data. However, initial insight gained in relation  
114 to the overall alignment is limited, especially when viewing alignments  
115 consisting of many sequences representing varying factors of interest such as  
116 geographical location, subtype, treatment strategy, compartment and date /  
117 time-point. Basic alignment visualization should have the potential to increase  
118 the level of initial insight within sequence datasets whilst not delving into the  
119 realms of more complex sequence analysis. Here we present CView, a simple  
120 multiple sequence alignment visualizer that incorporates a dynamic network  
121 that is based on a summarization of the diversity across different regions of  
122 the alignment. The immediate coupling of aligned sequences to such a  
123 network provides a way of visually tracking the context of observed diversity

124 within characters that are currently onscreen to that of the surrounding  
125 regions of the alignment not currently in view. This provides the user with an  
126 increased intuitive and visual summarization of the context of this diversity.

127

128 CView provides a range of export features that can be applied to the entire  
129 alignment, to a specified region of the alignment, or to a specified region in  
130 conjunction with a specified subset of sequences. Such export features  
131 include: variant summarization, per-site character and kmer frequency  
132 matrixes, clustered sequences, pairwise-distance matrixes as well as  
133 consensus sequence generation. For example, when the variant  
134 summarization option is selected a list of variants spanning the user-specified  
135 region, within the user-specified group of sequences, is created by identifying  
136 all unique forms and associating each with their frequency of occurrence. A  
137 list of the original sequence titles represented by each variant is also  
138 maintained. Such a feature has use in the tracking of viral populations, for  
139 example in searching for the presence of genotypic alterations such as those  
140 associated with immune escape [13], drug resistance [14], or co-receptor  
141 usage [15,16]. Additionally, this feature has use in both clinical [17], and  
142 environmental metagenomics [18–20], where the summarization of  
143 populations of microbes is of interest. Each such export option is described  
144 detail within the user manual that is available on the SourceForge wiki located  
145 at <https://sourceforge.net/p/cview/wiki/Help/>. Aside from features related to the  
146 extraction of secondary information from the alignment, CView provides the  
147 ability to dissection the alignment into subsets of sequences and regions; a  
148 task that is often laborious in the absence of a background in script

149 development. For example, a user can export a specified region of sequences  
150 associated with a specific time-point, geographical location or body  
151 compartment, as long as the sequence titles have been labelled with such  
152 information. Such labelling is often as standard output feature of many  
153 sequence repositories, for example from the Los Alamos HIV sequence  
154 database the user can select options such as subtype, patient code, country  
155 and year to be included within the title of each sequence [21], but such  
156 information may also be part of experimental design such as compartment  
157 [22] or time-point [23].

158

159 Within CView the associated network is displayed directly below the  
160 alignment. This network is based on the clustering of sequences within  
161 windows placed consecutively across the alignment, where each cluster  
162 becomes a node. Edges are placed between nodes of neighbouring windows  
163 where they share differing regions of the same sequence(s). Thus, if a single  
164 node within a diverse region of the alignment is selected, then the relationship  
165 that all sequences passing through that node have to other regions of  
166 diversity within the alignment can be instantly observed. Here we describe  
167 how these networks are constructed and graphically displayed. The clustering  
168 threshold used during network construction, as well as the number and width  
169 of windows, are specified on the user-interface through a series of user-  
170 friendly slider bars. Alterations are updated in real time, which allows the user  
171 to rapidly explore the visualization of variable regions across the alignment.  
172 The software has been designed to be user friendly, intuitive and interactive

173 and it, along with source code, a quick start guide and test data, is available  
174 through the SourceForge project page: <https://sourceforge.net/projects/cview/>.

175

## 176 **Methods**

### 177 **Implementation**

178 The interface has been designed for simplicity and clarity. It consists of four  
179 basic areas of user-interaction (figure 1) which are: (1) sequence view, (2)  
180 network view, (3) navigation and control and, (4) menu driven outputs.

181

182 **Figure 1: CView interface.** The four main areas of the CView interface are  
183 depicted. These are sequence view, network view, control panel and the top  
184 menu. The yellow numbers on the top indicate the sites of the alignment that  
185 are currently in view. These correspond to the yellow bar on the top of the  
186 location indicator. The orange numbers along the bottom indicate the  
187 locations of the windows that nodes within the network are dependent on.  
188 These window locations correspond to the area that the orange bar located  
189 the under the location indicator covers. Grey dots indicate (selectable) nodes  
190 within windows. The squares along the location indicator can also be selected  
191 in order to jump directly to the indicated co-ordinates. The red text around the  
192 outside of the interface describes the main features.

193

#### 194 (1) Sequence View

195 Sequences are displayed above the alignment location indicator. The dynamic  
196 yellow bar associated with the latter represents the region of the alignment  
197 that is currently visible. The green dot on the right hand side indicates what

198 proportion of the alignment is visible. The consensus sequence of the  
199 alignment is displayed along the top of the sequence area, and directly under  
200 this the “+” indicates columns where all characters agree with the consensus  
201 character. Sequences and their titles are selectable and when a sequence is  
202 chosen it will be traced through the corresponding network as a yellow line.  
203 Sequences that pass through a user-selected node on the network are  
204 displayed with a red dot next to the title. Basic interactive features associated  
205 with the sequence display include the masking of characters that are the  
206 same as consensus, altering font size and altering space allocated to  
207 displaying titles; these are achieved through the “Navigation and Control”  
208 panel. Site locations are highlighted in yellow along the top of the interface.

209

## 210 (2) Network View

211 The network depicting sequence diversity within the alignment is displayed  
212 directly below the alignment location indicator. The associated orange bar of  
213 the latter represents the region of the alignment that is currently represented  
214 by the network. The region begins from the current sequence view and  
215 extends to the right-hand side in a manner that is dependent on the number of  
216 consecutive windows, as well as their width (figure 2, step i); windows being  
217 regions from which nodes reflecting diversity are created. Both these  
218 parameters can be interactively altered by the user. Window locations are  
219 highlighted in orange along the bottom of the interface.

220

221 **Figure 2: Network construction.** Coloured bars indicate unique sequence  
222 id's relative to the corresponding sequences (dotted lines). Within each



223 window sequence id's are associated with individual sequence fragments  
224 spanning that window (i) and fragments within windows are clustered (ii).  
225 Edges are placed between neighbouring clusters where they share one or  
226 more sequence id (iii). Clusters are represented visually on the network by  
227 grey dots. If a single cluster is selected the paths of all sequences passing  
228 through in relation to all other clusters (red lines) can be traced (vi).

229

### 230 (2.1) Nodes

231 For a given window clustering fragments of sequences that span it creates  
232 nodes (figure 2, step ii). Each cluster is created using an iterative approach.  
233 Initially a fragment is randomly selected to be a seed for a newly created  
234 empty cluster. All related fragments to that seed are then added to the cluster  
235 and become seeds for the next iteration. The metric used to define  
236 relatedness is hamming distance, in which the number of different characters  
237 between two aligned sequences are counted. The default threshold value is  
238 0.3, indicating that fragments that have less than 30% divergence from a seed  
239 are included within the cluster. More advanced measures of genetic distance  
240 exist that account for proposed models of sequence evolution at both  
241 nucleotide and amino acid levels [24,25], but for the rapid clustering across  
242 windows placed along an alignment for the purpose of visualization hamming  
243 distance works well [26]. Iterations continue until no more next-round seeds  
244 can be identified. If unclustered fragments within the window still exist, a new  
245 cluster is initiated by selecting another random seed from the remaining  
246 fragments and the process is repeated.

247

248 For windows where six or less clusters are created, all clusters are displayed  
249 as grey coloured circles, or nodes, on the network. For windows with more  
250 than six clusters, the largest six are displayed as nodes whilst the remaining  
251 are placed into a holding structure that is used for visualization purpose only  
252 and that is displayed as a black circle. Internally all clusters contained within  
253 the latter are treated separately, for example in relation to tracking and  
254 highlighting paths. Here six was chosen to be the upper limit so that following  
255 edge placement (next section), and during edge crossover minimization, the  
256 maximum number of nodes that need order re-arrangement within any one  
257 window is seven, including the holding node. This is because for a set  
258 containing  $n$  items, there are  $n$  factorial different order permutations [27], and  
259 during edge crossover minimization the number of edge crossovers produced  
260 by each permutation, in relation to nodes within a neighbouring window, must  
261 be counted. For a given window if there are the maximum of seven nodes  
262 present,  $7!$  permutations (5040) must be identified during crossover  
263 minimization and this can be done in a reasonable time ( $< 1$  second on an  
264 average laptop). If on the other hand there are fifteen nodes allowed within a  
265 window, then there are  $15!$  permutations (1307674368000) requiring a time of  
266 many days.

267

268 The default number (10) and width (50 bp) of windows, as well as the pairwise  
269 distance threshold, can be altered using the slider bars within the “Navigation  
270 and Control” area. The CViews graphical display is for rapid intuitive  
271 visualization, and if a higher clustering resolution is required, i.e. less than the  
272 0.2 lower bound allowed for the display network, the user can perform this

273 using the “Cluster Sequences” option of the “Alignment” menu. The number of  
274 sequence passing through each node is indicated in green on the left and  
275 right hand sides of the network.

276

## 277 (2.2) Edges

278 Edges are placed between nodes of neighbouring windows where they  
279 possess fragments that are derived from the same underlying sequence(s)  
280 (figure 2, iii). Consequently, individual sequences can be traced through  
281 nodes across different windows. As previously mentioned edge crossover  
282 between nodes within adjacent windows is minimized. Starting at the second  
283 most right-hand-side window, this is done by calculating all possible node  
284 order permutations, following which for each permutation, the number of edge  
285 crossovers to nodes within the adjacent right-hand window is counted, node  
286 layout order in the latter being kept constant (figure 3). The permutations that  
287 produce the minimum number of crossovers are selected (figure 3, red  
288 numbers), and from these a random one is used. The process is then  
289 repeated one window to the left, until the first window of the alignment is  
290 reached. Crossover minimization, while visually more pleasing, has no effect  
291 on the sequence information or underlying node connections. Following the  
292 connection of edges it is possible to click on nodes within the graph and track  
293 sequences that pass through them (figure 2, iv). On the interface, such  
294 sequence paths are displayed in red, and within the sequence display area a  
295 red dot are placed next to the titles of included sequences.

296

297 **Figure 3: Minimization of edge crossovers between nodes of the two**  
298 **right most windows of the alignment.** This process is repeated until the left  
299 most window (anchored on site 1) is reached. Clusters within the two windows  
300 are labelled with integers and required edges, based on the sequence ids  
301 (coloured bars), are listed (i). All order permutations of the current left window  
302 are identified and for each permutation the required edges are placed relative  
303 to the constant cluster order of the right window (ii). Crossovers are then  
304 counted (red numbers). Of the permutations that produce the minimum  
305 number of crossovers a random one is selected for graphical node layout  
306 order.

307

### 308 (3) Navigation and Control

309 Access to all the previous described options is provided through the slider  
310 bars associated with the navigation and control panel (bottom right of figure  
311 1). The buttons labelled with then red directional arrows are used to scroll  
312 through the alignment. These were implemented to remove the need for flat  
313 scroll bars as future developments will be aimed at tablets and mobile  
314 devices. The red dot, at the centre of the four scroll arrows, immediately  
315 jumps a viewpoint at the centre of the alignment. In addition to the directional  
316 arrows the user can click directly on the grey squares along the alignment  
317 location indicator bar to immediately move to a particular location. Within this  
318 control area there are also three buttons used for printing the network to a  
319 .png formatted image file.

320

### 321 (4) Menu Driven Output

322 Output options are accessed through the top menu bar and can be applied to  
323 (i) the alignment in general, (ii) subsets of sequences whose titles match a  
324 user search tag, (iii) subsets of sequences that pass through a selected node  
325 and (iv) subsets of sequences defined by the user based on a supplied file of  
326 titles. In addition to exporting subsets of sequences and/or specified regions  
327 of the alignment Cview can generate summary statistics such as frequencies  
328 of residues and kmers and tertiary, pairwise distance matrix's, variant count  
329 information and clustered sets of sequences. A detailed description of each  
330 output option is presented on the wiki associated with the SourceForge  
331 project page (<https://sourceforge.net/p/cview/wiki/Help/>).

332

## 333 **Results**

334 (1) The software

335 CView has been implemented in Java and runs on operating systems with  
336 installed Java Runtime Environment 8.0 or higher. It has been developed  
337 using an object-orientated approach for ease of plug-in development; where  
338 plug-ins related to alignment visualization will be based on user feedback. To  
339 obtain an executable jar file, download the cview.zip file from the SourceForge  
340 project page. Following the extraction the CView.jar file from the zip file,  
341 CView is executed by double clicking on the jar file. This will launch the  
342 interface through which alignments can be loaded. Alignments must be in  
343 fasta format and are be loaded using the "Load (fasta)" option of the "All  
344 Sequences" menu. Once a fasta-formatted alignment is loaded the workflow  
345 is driven by how the user interacts with the interface and the various output  
346 options. Test data, in the form of an alignment consisting of 636 sequences

347 representing the gp120 region of the HIV-1 genome is included with the  
348 cview.zip file that contains the software. This data was obtained from the Los  
349 Alamos HIV sequence database [21].

350

351 (2) Test Case Example: Exploring variation associated with co-receptor usage

352 (2.1) Background

353 HIV-1 viruses can be characterized into two phenotypes that are dependent  
354 on cellular tropism and that are as a result of differences in co-receptor usage  
355 [28]. The macrophage tropic phenotype, often referred to as R5, requires the  
356 CCR5 co-receptor, whilst the T-cell tropic phenotype (X4) uses the CXCR4  
357 co-receptor, the latter often emerging later on during infection [29]. Co-  
358 receptor usage can be detected by computational analysis based on specific  
359 genetic alterations within the V3 loop of the gp120 gene [15,16]. Genetic  
360 variation within this region, of approximately 105 nt in length, lead to structural  
361 shifts that result in optimized binding to one co-receptor or the other [30]. For  
362 demonstrating the applicability of CView we have used it to explore and  
363 summarize this known variation relating to co-receptor usage from an  
364 alignment of HIV-1 subtype B gp120 sequences.

365

366 (2.2) Method

367 1. All North American subtype B gp120 sequences, verified to be CCR5-using  
368 sequences (n = 636), were downloaded from the Los Alamos HIV sequence  
369 database in aligned fasta format [21]. These were loaded into CView, using  
370 the “Load (fasta)” option of the “All Sequences” menu, following which they  
371 were saved in unaligned format using the “Save (unaligned)” option of the “All

372 Sequences” menu. Additionally, the titles of these sequences were saved to a  
373 separate file using the “Save (titles)” option.

374

375 2. Step 1 was repeated for CXCR4-using sequences (n = 76).

376

377 3. In order to make sites directly comparable between the two sets of  
378 unaligned sequences, they were combined into a single file and aligned using  
379 MUSCLE [1].

380

381 4. The resulting alignment was loaded into CView and the consensus  
382 sequence of the region spanning the V3 loop was saved using the “Save  
383 (consensus)” option of the “All Sequences” menu. Within this alignment the  
384 co-ordinates of the region spanning the V3 loop were from 1436 to 1568.  
385 Although the exact location of the V3 loop within the gp120 region is known,  
386 the coordinates will vary depending on the alignment due to the placement of  
387 gaps during the alignment process. The exact co-ordinates for our alignment  
388 were identified by eye using the V3 sequence of the HIV-1 reference strain  
389 (Name: HXB2-LAI-IIIB-BRU, Accession: K03455), where the start residues of  
390 the loop are TGTACAAGACCC and the end residues are CAAGCACATTGT  
391 [21].

392

393 5. Using the original sequence titles saved in step 1, the proportion of the  
394 alignment corresponding to R5 sequences was saved in aligned format. This  
395 was done using the “Save (from - to)” option under the “Groups” menu item,  
396 where the titles were supplied as a list to define the group.

397

398 6. Step 4 was repeated for the titles corresponding to the X4 sequences.

399

400 7. Steps 5 and 6 resulted in two sub-alignments whose site co-ordinates are  
401 compatible as they were both extracted from the same underlying source. For  
402 each of the extracted R5 and X4 alignments, CView was used to obtain a list  
403 of all variants spanning the V3 loop along with their frequencies. This was  
404 done using the “Frequencies (variants)” option of the “All Sequences” menu,  
405 where the co-ordinates used were those described in step 3.

406

407 8. Variants were translated using the EMBOSS Transeq tool [31].

408

409 9. For each of the R5 and X4 alignments, nucleotide frequencies were  
410 obtained using the “Frequencies (nuc/aa)” option of the “All Sequence” menu  
411 (co-ordinates: 1436 to 1568).

412

413 The underlying alignment described for this use-case scenario, consisting of  
414 all the HIV-1 SUBTYPE B sequences spanning the GP120 region of the  
415 genome that have been verified as either being a CCR5-using (n = 636) or  
416 CXCR-using (n = 76), is available from the CView project page, within the  
417 compressed folder USE\_CASE\_DATA.zip. A further test dataset consisting of  
418 just the CCR5-using sequences from above is contained within the zip folder  
419 where the software itself is located.

420

421 (2.3) Result and Discussion



422 Figure 4A displays the consensus sequence of the V3 region from the  
423 MUSCLE generated alignment prior to being divided by genotype. The top ten  
424 most frequent variants from each of the two genotypes are also displayed.  
425 The seqPublish tool, located at  
426 <https://www.hiv.lanl.gov/content/sequence/SeqPublish/seqpublish.html> [21],  
427 was used to format these alignments from the CView output such that  
428 characters identical to those of the consensus sequence were hidden. A  
429 similar feature is available at the bottom of the output file that is generated by  
430 the “Variant Frequency” option of CView, where residues that are identical to  
431 those present on the most frequent variant are represented by a “|” character.  
432 The translation of each of these variants is presented within figure 4B. A  
433 summary, using sequence logos [32], is available within figure 4C where it  
434 can be observed that at translated site 11 the positively charged amino acid  
435 residues R (arginine) and H (histidine) are present within the sequences that  
436 were known to be CXCR4-using, while they are absent within the sequences  
437 obtained from the CCR5-using strains. At site 26 a similar observation is  
438 made in relation to positively charged residues, this time including a K (lysine)  
439 residue; although there is a minority K also present at 26 within the CCR5-  
440 using variants. This is a known observation where the presence of positively  
441 charged amino acids at sites 11 and 26 result in a structural alteration that  
442 optimizes CXCR4 co-receptor binding [15,16]. The steps leading to this  
443 observation, within this use-case scenario, demonstrate the utility of CView  
444 when exploring such alignment data. Complete per-site nucleotide  
445 frequencies for both R5 and X4 sequences spanning the V3 region are  
446 presented in supplementary table S1.

447

448 **Figure 4: Summarization of variation present within the V3 loop.** (A)

449 Green residues represent non-consensus residues from the ten most frequent  
450 variants associate with the CCR5-using phenotype. Brown represents those  
451 of the CXCR4-using phenotype. The consensus sequence (black) is shown.

452 (B) Translations of the most frequent ten variants from each phenotype. (C)

453 Sequence logos summarizing these translations. The top logo is from  
454 represents the CCR5-using sequences whilst the bottom represents the  
455 CXCR4-using ones.

456

## 457 **Conclusion**

458 CView is a tool that allows the user to interactively explore sequence  
459 alignments with the aid of a dynamic network that summarizes the diversity  
460 present. Here we have described how CView was designed and, as an  
461 example, we have used it to aid in the characterization of known variation  
462 between sequences involved in HIV-1 co-receptor usage. The exact usage  
463 scenario in which CView can be applied is dependent on the requirements of  
464 the individual user. CView is available from <https://sourceforge.net/p/cview>.

465

## 466 **Funding**

467

468 This work was funded by National Funds through FCT (Fundação para a  
469 Ciência e a Tecnologia) and FEDER through the Operational Programme for  
470 Competitiveness Factors (COMPETE), via a project awarded to JA, under the  
471 references POCI-01-0145-FEDER-029115 and PTDC/BIA-EVL/29115/2017.

472 RL's post doctoral position was supported by this project under POCI-01-  
473 0145-FEDER-029115.

474

475

## 476 **References**

477

- 478 1. Edgar R. MUSCLE: multiple sequence alignment with high accuracy  
479 and high throughput. *Nucleic Acids Res.* 2004;32: 1792–1797.  
480 doi:10.1093/NAR/GKH340
- 481 2. Larkin M, Blackshields G, Brown N, Chenna R, McGettigan P,  
482 McWilliam H, et al. Clustal W and Clustal X version 2.0. *Bioinformatics.*  
483 2007;23: 2947–2948. doi:10.1093/BIOINFORMATICS/BTM404
- 484 3. Martin ACR. Viewing multiple sequence alignments with the JavaScript  
485 Sequence Alignment Viewer (JSAV). *F1000Research* 2014 3249.  
486 2014;3: 249. doi:10.12688/f1000research.5486.1
- 487 4. Gomez J, Jimenez R. Sequence, a BioJS component for visualising  
488 sequences. *F1000Research.* 2014;3.  
489 doi:10.12688/F1000RESEARCH.3-52.V1
- 490 5. Sanchez-Villeda H, Schroeder S, Flint-Garcia S, Guill KE, Yamasaki M,  
491 McMullen MD. DNAAAlignEditor: DNA alignment editor tool. *BMC*  
492 *Bioinformatics.* 2008;9: 154. doi:10.1186/1471-2105-9-154
- 493 6. Hall T. BioEdit: a user-friendly biological sequence alignment editor and  
494 analysis program for Windows 95/98/NT. *Nucleic Acids Symp Ser.*  
495 1999; 95–98. Available: <https://ci.nii.ac.jp/naid/10030689140/>
- 496 7. Clamp M, Cuff J, Searle SM, Barton GJ. The Jalview Java alignment  
497 editor. *Bioinformatics.* 2004;20: 426–427.  
498 doi:10.1093/BIOINFORMATICS/BTG430
- 499 8. Kearse M, Moir R, Wilson A, Stones-Havas S, Cheung M, Sturrock S, et  
500 al. Geneious Basic: An integrated and extendable desktop software  
501 platform for the organization and analysis of sequence data.  
502 *Bioinformatics.* 2012;28: 1647–1649.  
503 doi:10.1093/BIOINFORMATICS/BTS199
- 504 9. Sohpal VK, Dey A, Singh A. MEGA biocentric software for sequence  
505 and phylogenetic analysis: A review. *Int J Bioinform Res Appl.* 2010;6:  
506 230–240. doi:10.1504/IJBRA.2010.034072
- 507 10. Thorvaldsdóttir H, Robinson JT, Mesirov JP. Integrative Genomics  
508 Viewer (IGV): high-performance genomics data visualization and  
509 exploration. *Brief Bioinform.* 2013;14: 178–192.  
510 doi:10.1093/BIB/BBS017
- 511 11. Abeel T, Van Parys T, Saeys Y, Galagan J, Van de Peer Y.  
512 GenomeView: a next-generation genome browser. *Nucleic Acids Res.*  
513 2012;40. doi:10.1093/NAR/GKR995
- 514 12. Milne I, Stephen G, Bayer M, Cock P, Pritchard L, Cardle L, et al. Using  
515 Tablet for visual exploration of second-generation sequencing data.  
516 *Brief Bioinform.* 2013;14: 193–202. doi:10.1093/BIB/BBS012
- 517 13. Harvey WT, Carabelli AM, Jackson B, Gupta RK, Thomson EC,  
518 Harrison EM, et al. SARS-CoV-2 variants, spike mutations and immune  
519 escape. *Nat Rev Microbiol* 2021 197. 2021;19: 409–424.

- 520 doi:10.1038/s41579-021-00573-0
- 521 14. Günthard HF, Calvez V, Paredes R, Pillay D, Shafer RW, Wensing AM,  
522 et al. Human Immunodeficiency Virus Drug Resistance: 2018  
523 Recommendations of the International Antiviral Society–USA Panel.  
524 *Clin Infect Dis*. 2019;68: 177–187. doi:10.1093/CID/CY463
- 525 15. Lengauer T, Sander O, Sierra S, Thielen A, Kaiser R. Bioinformatics  
526 prediction of HIV coreceptor usage. *Nat Biotechnol* 2007 2512. 2007;25:  
527 1407–1410. doi:10.1038/nbt1371
- 528 16. Jensen M, Li F, Van 't Wout V, Nickle D, Shriner D, He H, et al.  
529 Improved coreceptor usage prediction and genotypic monitoring of R5-  
530 to-X4 transition by motif analysis of human immunodeficiency virus type  
531 1 env V3 loop sequences. *J Virol*. 2003;77: 13376–13388.  
532 doi:10.1128/JVI.77.24.13376-13388.2003
- 533 17. Chiu CY, Miller SA. Clinical metagenomics. *Nat Rev Genet* 2019 206.  
534 2019;20: 341–355. doi:10.1038/s41576-019-0113-7
- 535 18. Zhao F, Bajic V. The value and significance of metagenomics of marine  
536 environments. *Genomics Proteomics Bioinforma*. 2015;13: 271–274.  
537 doi:10.1016/j.gpb.2015.10.002
- 538 19. Ufarte L, Laville E, Duquesne S, Potocki-Veronese G. Metagenomics  
539 for the discovery of pollutant degrading enzymes. *Biotechnol Adv*.  
540 2015;33: 1845–1854. doi:10.1016/j.biotechadv.2015.10.009
- 541 20. Tringe SG, Rubin EM. Metagenomics: DNA sequencing of  
542 environmental samples. *Nat Rev Genet* 2005 611. 2005;6: 805–814.  
543 doi:10.1038/nrg1709
- 544 21. Kuiken C, Korber B, Shafer RW. HIV Sequence Databases. *AIDS Rev*.  
545 2003;5: 52. Available: /pmc/articles/PMC2613779/
- 546 22. Lorenzo-Redondo R, Fryer H, Bedford T, Kim E, Archer J, Pond S, et al.  
547 Persistent HIV-1 replication maintains the tissue reservoir during  
548 therapy. *Nature*. 2016;530: 51–56. doi:10.1038/NATURE16933
- 549 23. Archer J, Rambaut A, Taillon B, Harrigan P, Lewis M, Robertson D. The  
550 evolutionary analysis of emerging low frequency HIV-1 CXCR4 using  
551 variants through time--an ultra-deep approach. *PLoS Comput Biol*.  
552 2010;6. doi:10.1371/JOURNAL.PCBI.1001022
- 553 24. Darriba D, Posada D, Kozlov AM, Stamatakis A, Morel B, Flouri T.  
554 ModelTest-NG: A New and Scalable Tool for the Selection of DNA and  
555 Protein Evolutionary Models. *Mol Biol Evol*. 2020;37: 291.  
556 doi:10.1093/MOLBEV/MSZ189
- 557 25. Shapiro B, Rambaut A, Drummond AJ. Choosing Appropriate  
558 Substitution Models for the Phylogenetic Analysis of Protein-Coding  
559 Sequences. *Mol Biol Evol*. 2006;23: 7–9. doi:10.1093/MOLBEV/MSJ021
- 560 26. Pilcher CD, Wong JK, Pillai SK. Inferring HIV Transmission Dynamics  
561 from Phylogenetic Sequence Relationships. *PLoS Med*. 2008;5: 0350–  
562 0352. doi:10.1371/JOURNAL.PMED.0050069
- 563 27. Knuth D. *The Art of Computer Programming*. 3rd ed. Addison-Wesley;  
564 1997.
- 565 28. Moore J, Kitchen S, Pugach P, Zack J. The CCR5 and CXCR4  
566 coreceptors--central to understanding the transmission and  
567 pathogenesis of human immunodeficiency virus type 1 infection. *AIDS*  
568 *Res Hum Retroviruses*. 2004;20: 111–126.  
569 doi:10.1089/088922204322749567

- 570 29. Mild M, Kvist A, Esbjörnsson J, Karlsson I, Fenyö E, Medstrand P.  
571 Differences in molecular evolution between switch (R5 to R5X4/X4-  
572 tropic) and non-switch (R5-tropic only) HIV-1 populations during  
573 infection. *Infect Genet Evol.* 2010;10: 356–364.  
574 doi:10.1016/J.MEEGID.2009.05.003  
575 30. Cardozo T, Kimura T, Philpott S, Weiser B, Burger H, Zolla-Pazner S.  
576 Structural basis for coreceptor selectivity by the HIV type 1 V3 loop.  
577 *AIDS Res Hum Retroviruses.* 2007;23: 415–426.  
578 doi:10.1089/AID.2006.0130  
579 31. Madeira F, Park Y, Lee J, Buso N, Gur T, Madhusoodanan N, et al. The  
580 EMBL-EBI search and sequence analysis tools APIs in 2019. *Nucleic  
581 Acids Res.* 2019;47: W636–W641. doi:10.1093/NAR/GKZZ268  
582 32. Crooks G, Hon G, Chandonia J, Brenner S. WebLogo: a sequence logo  
583 generator. *Genome Res.* 2004;14: 1188–1190. doi:10.1101/GR.849004  
584  
585  
586

### 587 **Supporting Information Captions**

- 588  
589  
590 **Table S1: Nucleotide frequencies from the V3 loop.** Sites covering codon 11 and 26  
591 are highlighted in red.  
592

# dissect alignment and export information

load alignment

The screenshot displays the CVIEW software interface. At the top, a menu bar includes 'All Sequences', 'Title Search', 'Node Path', 'User Group', 'Plug-ins', and 'About'. The main window is divided into three sections: a sequence alignment view at the top, a network view at the bottom left, and a control panel at the bottom right. The sequence alignment view shows four columns of sequences with positions 375, 400, 425, and 450 marked. The network view shows a graph with nodes and edges, with nodes labeled with numbers like 76, 351, 451, 551, and 651. The control panel includes sliders for 'Max. Windows' (set to 8), 'Window Size' (set to 50), and 'Cluster Limit' (set to 0.39). It also has buttons for 'Print PNG', 'RM Red', and 'RM Yellow', and a section for 'Con. Mask', 'Font Size', 'Title Space', and 'Scroll Rate'. Red arrows point from external text labels to various elements in the interface.

sequence view

select nodes and use Node Path menu

network view

navigate with arrows OR go directly to locations

dynamically alter diversity network

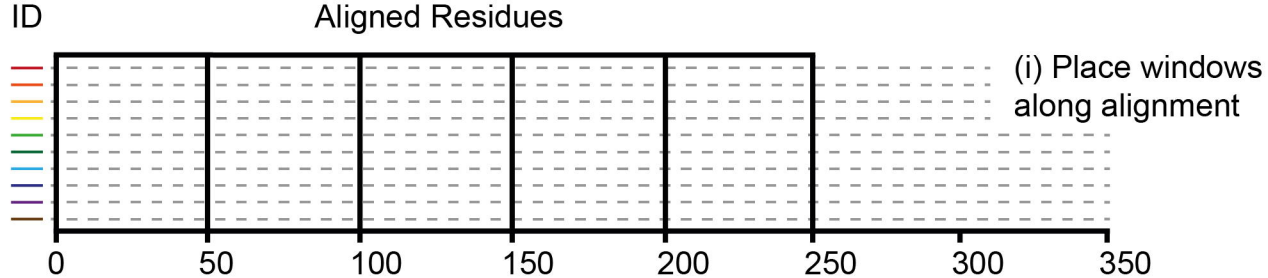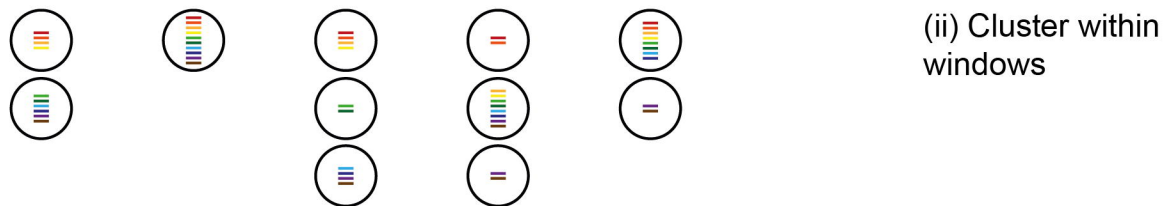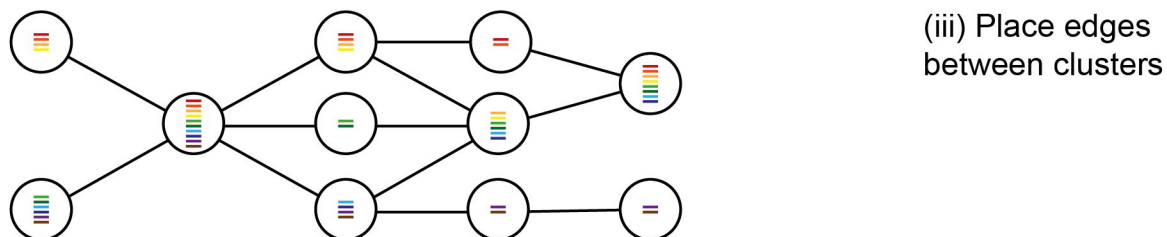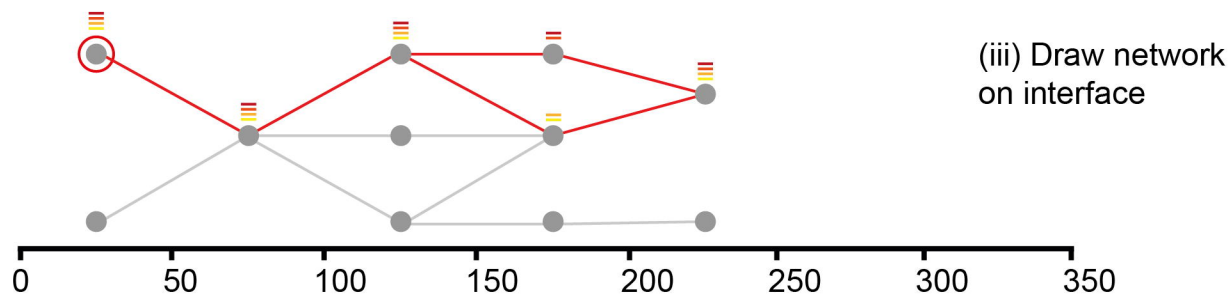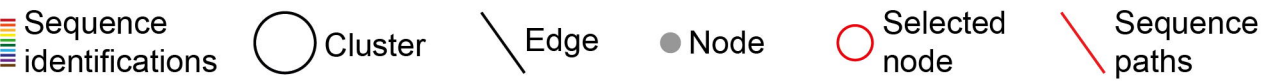



(i) Label clusters and identify required edges using shared sequence id's between clusters

ID    Aligned Residues

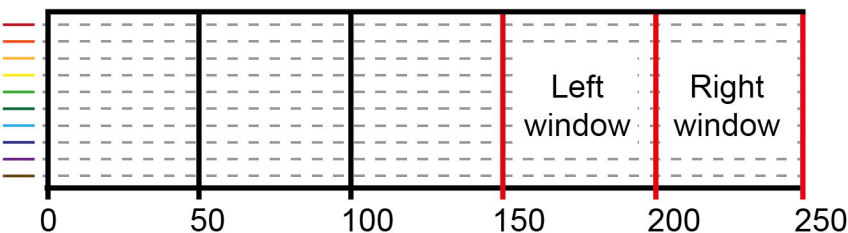

Left window (edge) nodes

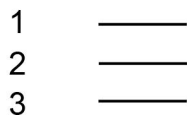

Right window nodes

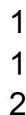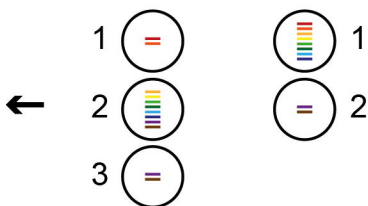

(ii) Calculate left-hand-side node order permutations and corresponding edge crossovers

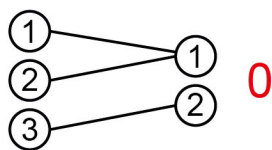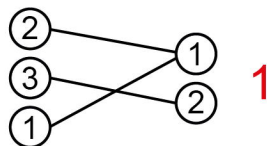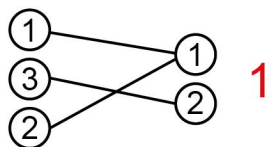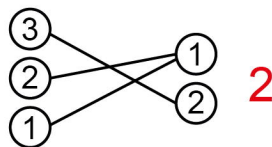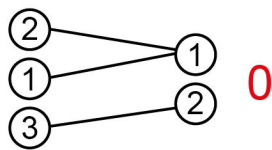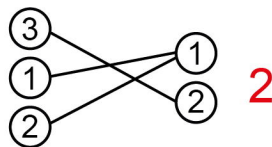



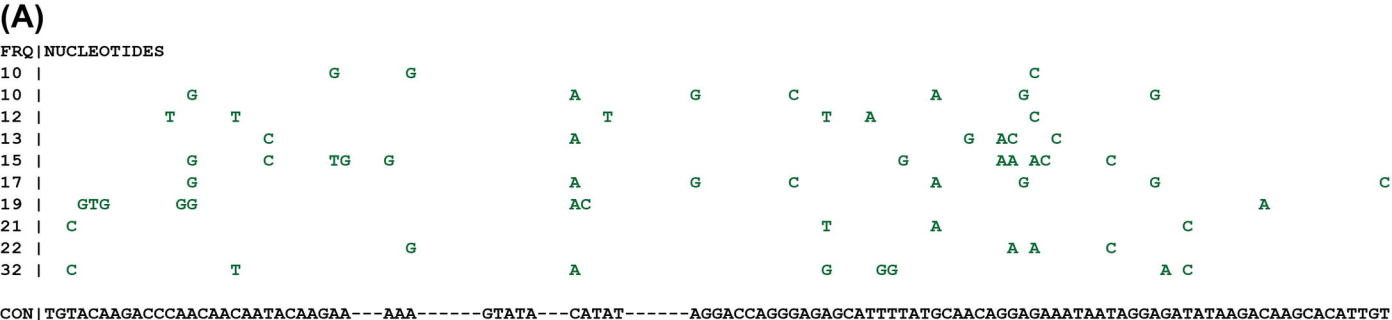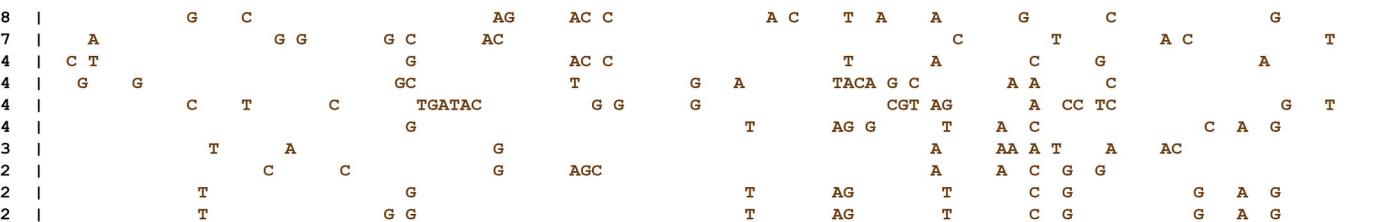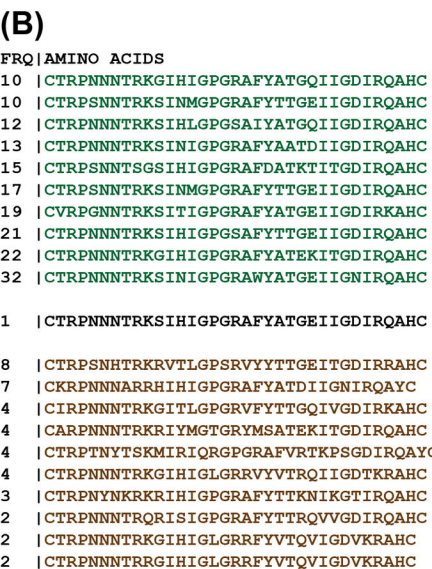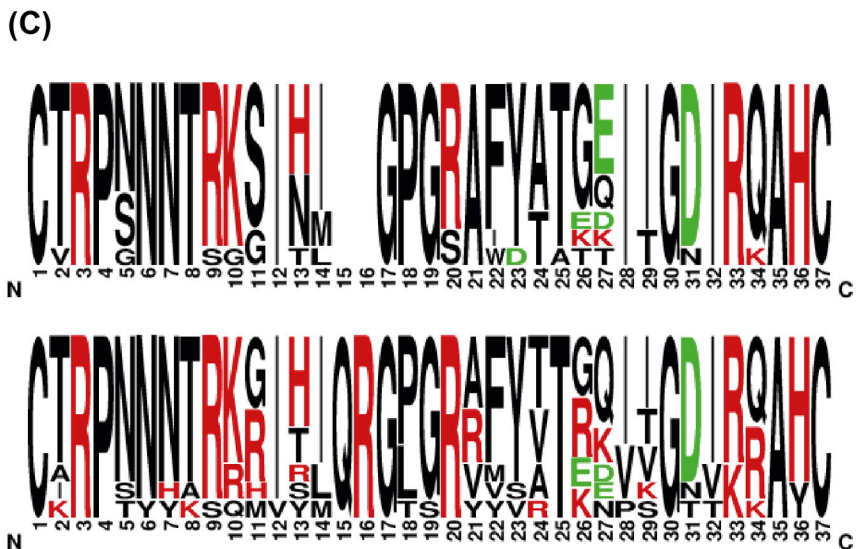

Source: https://www.biorxiv.org/content/10.1101/2022.01.17.476623v1.full.pdf
